# Supplementary material
Source: publisher figshare collection journal article supplement (https://future-science-group.figshare.com/ndownloader/files/31298062)
Supplement: Supplementary file 1 [file 31298062]

## Sheet: guide
	Name	Title
	supplementary table 1	Differentially expressed genes and miRNAs extracted through litrature review
	supplementary table 2	Top 100 in network string_interactions ranked by Degree method
	supplementary table 3	Hub genes of results from Venn diagram
	supplementary figure 1	KEGG pathway diagram explaining the role of RUNX3 on Th1/Th2 differentiation.
	supplementary figure 2	Complementary results analyzed and visualized using RNAhybrid server indicate an interaction between miR-210-3p and GATA3 with MFE = - 27.7 kcal/mol.

## Sheet: supplementary data file 1
Genes resulted of literature review	miRNAs
IFNG	hsa-miR-21
IL2	hsa-miR-24
IL10	hsa-miR-27
CSF2	hsa-miR-122a
LTA	hsa-miR-124
TNF	hsa-miR-125a-5p
IFNAR1	hsa-miR-138
IFNGR2	hsa-miR-140-5p
IL12RB1	hsa-miR-145
IL12RB2	hsa-miR-146a
IL18R1	hsa-miR-148a
IL18RAP	hsa-miR-155
IL27RA(WSX-1)	hsa-miR-214
gp130	hsa-miR-219a-5p
IL-23R	hsa-miR-340
IL12RB1	hsa-miR-371
TGFBR1	hsa-miR-544a
TGFBR2	hsa-miR-210
IL4R
IL2RG
IL21R
IL1RL1
IL6R
CCR5
CXCR3
CCR7
CCR6
TBX21
STAT1
STAT4
RUNX3
RUNX1
EOMES
HLX
IRF1
ETS1
NFATC2
NFATC3
RELB proto-oncogene, NF-kB subunit
NFKB1
RARA
YY1
ETV5
IRAK1
MYD88
TRAF6
BATF
ATF2
HIF1A
GATA3
BCL6
GFI1
STAT3
STAT6
IKZF1
PRDM1
FOXP3
RORC
SMAD2
SMAD3
AHR
MAF
IRF4
SOCS1
SOCS3
TSC1
TSC2
PRKAA2
DDIT4
ITK
SOCS5
SOCS2
TXK
MTOR 2
RHEB
MTOR
AKT1
MTOR 1
RPS6KB1
RPS6KB2
SGK1
HAVCR2
NOTCH3
S1PR1
LYN
STAT5
Sema4A
TGFB1
TIM-3
TIM-1
PARP
ETV7
CYP2C18
NTNG1
C9orf139
C20orf123
CFTR
LGALS17A
DGKG
CXCL9
EBF4
CD1A
MYH7
TSHZ2
APOD
RUFY4
ESRP1
CD22
ATP8B4
SPOCD1
TMEM51
IL23R
TNS1
SPSB1
PROS1
FAM110B
RGS14
ABCA2
UST
TMEM63C
MITF
SERPING1
COBLL1
IL6
FRAS1
FES
LOC100507463
GBP7
FAM167A
BOC
CCL2
DTX1
WDR31
WDFY3
UACA
KCNC3
KLF8
HYDIN
CLSTN3
FIGNL2
ALOX12P2
MTRNR2L9
MTRNR2L2
MAP3K6
RP9P
ROR1
FAM83E
LOC100507218
OSCAR
PARP10
LGALS9
HDX
GPR34
FSTL1
ZNF425
FURIN
RPS10P7
PIGY
CD33
S100A1
PEX5L
RAD9B
RAB3D
ZNF583
CEP112
BACE1-AS
GAS8
GTF2H3
SCARF1
KDM4D
TSSK2
LZTS2
FRAT2
S100PBP
ACP5
SMARCE1
LOC100130705
PQLC1
LOC646471
ZNF496
ATG9B
MSL1
LDLRAD2
ZYG11B
C17orf72
ABT1
CUTC
TMEM45B
SSH1
MED10
CCDC94
DOCK9
SNORA20
ARHGAP9
C12orf51
RPS29
ACACB
PRODH
FILIP1L
TBL1XR1
SNX2
HDAC10
LOC100130899
PTPRB
LOC653075
SART1
LAMA5
SNORD23
C17orf28
RPL39
MIR210HG
KDM2B
PIK3CG
GNB5
GEM
SNTA1
RPL38
GPRASP2
FOXJ1
BNIP3
VPS26B
CCNG2
MKRN1
TET1
PHYHD1
DHDH
ABCC1
CHN2
RIPK4
HCN2
ICK
CCDC114
CCRL2
TBXA2R
TRAF3IP2
FBXO44
CCDC146
UQCRB
RPL23
PRKG2
VPS13D
CD96
TEX14
REL
ARRB1
ARHGDIB
GATSL3
MYO9B
CLIP2
LAIR1
SMAGP
FAM134B
MADD
KANK3
NYNRIN
FAM124B
NAT6
IKZF2
ZNF217
CAMKK1
ETNK2
KCNH2
NLRC3
DEPDC7
DBP
GAL3ST4
KCNH3
HSPG2
CROCC
CH25H
PPFIA4
PHLPP1
COL6A2
TBC1D10C
LMTK3
GOLGA8B
MAML3
CRIP2
CLCN4
SIGLEC12
OPCML
EMID2
IL31
TIE1
GAD1
LIPG
SYT17
ISL2
RGS9
TIMP4
ARHGAP42
PDE3A
ENTPD1
INSRR
LOC100128993
SEMA3C
EFNA5
HECW2
CRH
ZNF488
AADAT
MBL1P
NEGR1
C9orf47
TMEM37
C1orf95
ALDH1A2
DUSP5P
SLC6A17
GNA14
MYO3B
APBA1
PLEKHA6
CYP7B1
TMEM88B
PDCD1LG2
EPHB1
CPE
NGEF
OGDHL
TMEM120B
BMP1
GNAZ
B4GALNT1
TNFRSF19
YBX2
RTN4RL2
ATP1A4
BRSK2
RHPN2
FAM110C
CCDC3
MAPK12
C1orf226
GIPC2
SLC4A4
AMOT
MATK
REV3L
GLUD2
ABCD3
IGLON5
EGFL7
RASAL2
MIR635
VSIG4
TPRN
BACE2
NUDT10
XIRP1
PGP
NACC1
TP73
LRRFIP1
GUCA1A
REEP1
SLC47A1
CLDN5
CCP110
SHISA8
LEPREL2
HLF
CERCAM
TMPRSS13
DIRAS1
ST3GAL2
RAB34
BEGAIN
LOC440028
POLR1A
NFAT5
CHDH
SH3D21
CMYA5
C14orf64
SMYD2
C17orf107
CHCHD10
LOC100132707
CHST10
AGAP3
MEX3A
AATF
POMT2
SLC7A8
CAT
FBXO41
SRCRB4D
MPZL3
DAXX
FKBP1AP1
GRINA
LOC284837
SCAMP4
LOC220906
GDF11
UNC5C
PLIN2
LOC100132077
SCAMP5
TLN2
SLC5A3
CTU1
LOC154092
C1orf201
TTLL11
LOC652276
FNTB
CFDP1
FBXO48
SPIB
TMCO7
FAM122A
PIP5K1C
LOC100129534
GNRHR
ZNFX1-AS1
TUBG2
STOX1
KHDRBS3
SLC5A10
MGAT1
ATP1A3
CCDC75
AEBP2
LOC100129387
HK3
MGC12916
KIAA0196
LOC100133161
MRPL55
DTX3
RGS17
DNM2
CCNL2
ZNF784
TRADD
CDHR2
OSCP1
RHD
UCN
LOC100507346
LETM2
HERC2P9
LOC221442
MCTP1
PLIN4
C10orf68
C2CD2
NDOR1
TTN
USP12
PTPN1
G2E3
FLJ31662
D2HGDH
HLA-DOA
CST3
ZNF384
TPT1
DYNLT3
ZUFSP
APBB3
XKRX
VAV1
PARD6B
IFIH1
UBQLNL
WASH7P
ESRG
AURKC
XRN1
COQ6
SFN
TJP2
SENP2
PNMA5
IFIT5
PRR24
QKI
COLQ
MAP3K8
STK35
ITGAX
FOXJ2
HIVEP2
TPH1
TRPM2
TG
TFPI
DUS3L
KIAA1530
IRAK3
RALGDS
SAT2
CCR1
LGMN
SQSTM1
EDA
SMARCA1
AKR7A3
TTC7A
SEC1
DENND3
IRF2BP1
DGCR2
CDKN1A
PPP1R2P3
CYP2D7P1
P2RY14
C14orf43
EXT1
PLA2G4B
FAM176A
HLA-DRB1
KIRREL
PLCH2
OLAH
HTT
REV1
ESR1
SERPINA1
HIST1H1E
IFI30
MTERFD2
ACVR1B
TSPAN9
CA6
SHISA2
RGL4
GALNT9
LOC285847
BST1
C7orf23
WNT8B
MTSS1
CA11
SIGLEC1
AGFG1
ITGA2
C16orf74
HES1
RAPGEF3
FSTL4
AFF2
G0S2
SSTR3
TYMP
FUT7
IL21
TBKBP1
MIAT
CHRNA6
PRR5L
MYH6
SYP
AIM2
TMCC2
CXCR5
GBP4
AHCYL2
ODF3B
MCTP2
ICAM1
SLC41A2
DRAM1
ABHD5
FLVCR2
GPR84
HOPX
MOSPD2
TMPRSS6
APOL1
NIPAL4
PCBP3
TMEM106A
SREBF2
ALPK1
MUC1
MORN4
GTF2IRD1
ADAM19
DTX3L
MAPK11
INHBA
CTSB
DNAJC6
EML2
SLAMF1
CHST11
TSPAN17
GCNT1
RAB7L1
MTRR
TANC1
TAP1
SAMD9L
NAPSA
BBS12
C9orf46
PARP9
TESK1
LY96
ZNF35
IFITM3
MGC2752
GRHL1
CPPED1
KDSR
SLC35F1
IFITM2
GBP2
MAD2L2
EHD4
HSPA13
MGC16121
ARHGEF10
SLX4
RGP1
FAM179A
TMEM205
CCDC126
LOC100506844
CDC14B
MDM1
PGAP1
STAMBP
GATAD1
METTL7A
ATP6V1B2
TRAF3IP2-AS1
ICOS
TMEM194B
USP18
KLRD1
BCL2L14
USP51
CPNE8
MBD6
AP1S3
AIG1
CLDND1
MITD1
CEBPB
PSMA3
ANP32A
ECHDC3
SLC39A10
GCH1
ELOVL7
FPGT
CRYZ
TIGD7
RBM8A
ACVR1
IFT81
THBS4
APOBEC3G
ZADH2
TTPAL
C3orf64
TCEB1
LIG3
TRMT6
CCNE2
SOCS4
FRA10AC1
SLC25A44
GALE
SIL1
ZNF267
DNAJC19
NOP14
CYBASC3
EIF3A
TMEM217
ZNF302
HINFP
CCL20
SENP1
BBS1
TFRC
RHOU
KRTCAP2
TTC22
SLC30A6
NDUFS7
NRN1
DNAJC15
FZD6
FAM104B
L3MBTL2
N6AMT1
LOC100131067
PARP3
PPP1R11
PIGO
DCPS
S100A6
SYNGR3
MIPEP
TINF2
C12orf45
ZNF585B
DEXI
LOC440944
KDELR1
CHM
GPR18
CKAP4
NR3C1
KCNMB4
DLST
KDM3B
ELP2
PI4KA
C5orf39
ITIH4
CCDC69
CD46
TCF25
SNX20
CTSL1
ZNF500
NET1
PIWIL4
TRAK2
BACH2
RAB20
TMIGD2
GMFG
CXCR7
CNKSR2
TBL1X
PRKD2
MAL
ZDHHC7
KIAA0748
PDE9A
VNN2
DDX20
FLJ20021
TET3
C1orf35
BRF1
HERC3
STAM
PIDD
PDLIM2
NGFRAP1
DOK2
AFF3
UBASH3A
TMEM191A
PLCG1
RAB27B
PECAM1
C1orf162
MED15
PRKD3
OSBPL5
CD248
AAK1
TOM1
CR2
NELF
CECR1
USP11
WHAMMP2
TCP11L2
MAOA
ANK1
PPP1R14A
PPARG
PLA2G4A
THY1
HRH1
FN1
CSF1
CCL22
FLJ45983
B3GNT5
ABHD6
B4GALT2
MACROD2
VSIG10L
NRP1
TREML2
MAOB
GPR98
INSM1
GPR87
MFAP3L
IL1RN
SLC26A4
PSEN2
DLC1
BCAR3
CYP51A1
IL13
ZNF780B
ANKRD33B
WWC3
MFSD2A
PDE4A
EFCAB4A
UBE2F
2007-08-31
RUSC1-AS1
STAMBPL1
SH3RF1
SIGLEC10
CYP1A1
SMOX
PTPN9
COL6A1
MVK
FAM150B
G6PD
MGLL
MFHAS1
DOCK5
OXCT2
SLC39A8
WNT5A
CCL17
GALNTL4
MMACHC
PRKCA
SPIRE1
SMAD2
KLHL23
CLDN1
GALNT7
WFS1
C9orf135
CLECL1
JOSD2
CASP3
ACADVL
XCL1
ZNF609
RHOF
CARD9
HPCAL1
RAVER1
PPAP2A
LEPR
TRIM65
PTRF
C12orf76
GHDC
ECH1
AVEN
MYO9A
TUBB6
HPS5
TLN1
NACC2
ID2
RSPH3
TNFSF11
LOC389641
MPL
SCRIB
PCYT2
KIF3C
HES6
MREG
MEAF6
ZDHHC8
VAV2
RAB8A
MET
ANKRD27
ATP6V0A1
KIAA1841
C11orf95
C1orf109
SOX8
TMEM133
CELSR3
CIRH1A
IFT80
RSAD2
HMGCR
SGPL1
SLC25A15
EXOC4
HADHA
IL28RA
ZEB2
HMGA1
NSDHL
CCDC64
F12
ATXN2
LDLR
WDR36
PTPRN2
HSPBP1
FDFT1
NOD2
SLC2A6
ESRRA
PLA2G16
GFOD2
FNBP1
MLLT1
C1orf53
SLCO4C1
ITGB1BP1
ZCCHC3
MLKL
GLRX3
SUOX
PSD3
RYBP
LASP1
EHD3
POLR3C
SNX10
PDSS1
DMXL2
FAM120A
NDUFB6
MAP4K1
NOP10
BCL2L13
HRAS
FKBP3
ARL6IP6
MPP1
ADORA2B
APLP2
BLVRA
ATP5J
MYL12A
SNX11
RNF115
ZNF239
NEDD8
CD164
TRAF1
MVD
CHP
BCAP31
COBRA1
TMEM180
POP7
XBP1
SF3B3
TRIM35
LPXN
TMBIM6
BCS1L
SMAD5
MRPS28
GPSM1
CA2
PSMD9
SLC30A5
ATP6V0E1
STK25
TCHP
HADHB
GNB1
SLC50A1
FAM98A
BCAP29
UBE3C
TTYH2
RGL1
PDCD2L
SLIRP
PSMA8
EMG1
ZSCAN22
TMEM135
TPM3
ANXA11
ZMYND19
CHST7
C2orf44
SLC25A1
TARS2
P2RX5
C2orf76
ZNF81
NME7
MLX
NOP56
TDP1
ERCC8
KLHL9
SEPW1
FAM102B
DSG2
PRADC1
TMEM206
TXNDC9
COQ3
CCDC28B
ZNF607
SRP68
TMEM55A
SPG20
NOP16
VIM
CCT8
RAB11FIP3
COMMD1
COX6A1
HARS
HDAC2
VCL
MAP2K2
KRT1
STX7
LSM10
PANK2
DNAAF2
RRAGA
PIGF
ABCB10
VCP
NSUN4
DFFA
IPO11
ACOT9
COG6
PNP
LMLN
NAA20
C12orf32
MTFR1
ARHGAP25
PRMT6
ATP5A1
FAM200A
CECR5
TAF12
GSPT2
CSNK2B
C14orf126
ACACA
GTPBP4
ANO6
MRPL20
SURF1
SYF2
ALG9
FBXW7
HNRNPUL1
C3orf17
TMEM8B
BCR
KIAA2026
TMX4
CCL28
TAX1BP1
RPS15A
FBXL5
CHIC1
HOOK1
CLASRP
LITAF
PTPRC
HPS4
SULT1A1
YTHDF1
SLC30A7
WASH3P
NARF
IRAK2
TULP3
WDR19
ANK3
MLLT10
HS3ST3B1
FAM134A
CRIPAK
C17orf108
CD27
DICER1
SLC7A7
GLRX
FCER1G
CCDC23
USP16
FAM169A
TLK1
ARRB2
CUL9
TTC32
CD44
RAP1B
STX12
CUL4B
SP100
LPAR6
OAZ2
IFIT3
ZMAT3
WDFY2
KIAA1429
RALGAPA1
ARHGAP21
FGFBP2
ARHGEF1
IL1B
ZNF337
GIMAP8
SIAE
TTC28-AS1
CBLB
CTSO
RABGAP1
TAB2
IDS
FTL
USP20
TLR2
EPB41
KIAA1468
HERC5
C12orf35
GUSBP11
MPPE1
MVP
TNFSF8
VPS8
LEPROT
FCGBP
ZBTB49
ARID5B
RELB
PYHIN1
MYL5
ZMYM1
CIC
SUSD3
FGD3
USP9Y
KAT7
DHX58
PITPNC1
TMEM173
1999-02-28
CHD7
IRF7
APOL3
IFI44L
C20orf112
C1QTNF6
PIK3CD
KIAA0913
CD28
LOC641518
SAMD9
CYTH3
CD84
GPR155
NFKBIA
PRKCH
SBNO2
BTN3A1
ZNF280D
VWA5A
ZNF831
RGMB
BCL3
TTC39C
RAPGEF2
SMAD3
XAF1
CD7
ENPP2
SAMHD1
TRERF1
MX1
S100A8
PAG1
LOC154761
SEC31B
CITED2
TSC22D1
TRIM22
DPEP2
SH2D1A
TRPS1
FAM107B
MALT1
S100A9
STK17A
GIMAP1
FAM65B
TRAT1
SPEG
GPA33
GATA3
GIMAP4
B7H6
ADCY1
OSM
CCL4
SLAMF7
FAM184A
CTNS
HOMER2
GAB2
GIMAP7
ABAT
RUNX2
IGSF3
NTRK1
PTPN3
TAC1
TNFRSF11A
ZNF697
PTGER4
CALD1
DMD
FGF2
LRRC32
IL12RB2
ENC1
BHLHE40
KSR1
RAMP1
NEK6
PHLDA1
FAM40B
TIFA
GBP5
PLEKHA7
TNF-α
RANTES
CCR2
IκB
TIMP-1
Caspase-1
Clusterin
IL-4R
FGFR
CCR4

## Sheet: supplementary data file 2
Column1	Column2	Column3
Top 100 in network string_interactions.tsv ranked by Degree method
Rank	Name	Score
1	AKT1	211.0
2	IL6	203.0
3	TNF	191.0
4	STAT3	176.0
5	IL10	156.0
6	IL2	150.0
7	STAT1	144.0
8	HRAS	131.0
9	PTPRC	126.0
10	FN1	122.0
11	IL1B	117.0
12	TLR2	114.0
13	FOXP3	111.0
14	CD44	110.0
15	IFNG	108.0
16	CSF2	107.0
17	CASP3	101.0
18	ICAM1	99.0
18	CD28	99.0
20	CCL2	97.0
21	IRF4	93.0
22	IL13	92.0
22	STAT5B	92.0
24	ESR1	91.0
25	CCR5	90.0
25	CCL5	90.0
25	ITGAX	90.0
25	TBX21	90.0
25	MTOR	90.0
30	TRAF6	86.0
30	GATA3	86.0
32	SOCS3	84.0
33	CCR7	82.0
33	STAT6	82.0
35	MYD88	81.0
36	IRF1	80.0
36	SOCS1	80.0
38	PPARG	77.0
38	CASP1	77.0
40	CXCR3	76.0
40	IRF7	76.0
42	STAT4	75.0
43	CXCR5	74.0
43	CCL4	74.0
43	NFKB1	74.0
46	CSF1	71.0
46	FGF2	71.0
48	CXCL9	67.0
48	TNFSF11	67.0
48	TGFB1	67.0
48	SMAD3	67.0
48	BCL6	67.0
53	CCR2	66.0
54	LYN	65.0
55	PECAM1	64.0
56	NFKBIA	62.0
57	CCR1	61.0
57	HDAC2	61.0
59	SMAD2	60.0
59	HIF1A	60.0
61	GNB1	59.0
61	MX1	59.0
63	CCL20	58.0
63	IFIH1	58.0
63	NOD2	58.0
66	IL21	57.0
66	CD27	57.0
68	TFRC	55.0
69	TIMP1	54.0
69	REL	54.0
71	IL2RG	52.0
72	RPS6KB1	51.0
72	PLCG1	51.0
74	CAT	50.0
74	HLA-DRB1	50.0
74	RELB	50.0
77	ARRB1	49.0
77	GNB5	49.0
77	CCRL2	49.0
77	IL6R	49.0
77	IRAK1	49.0
82	GPR29	48.0
82	RUNX3	48.0
82	VAV1	48.0
85	CFTR	47.0
85	ARRB2	47.0
85	CEBPB	47.0
85	ETS1	47.0
85	SLAMF1	47.0
90	RUNX2	46.0
90	IL23R	46.0
90	IL1RN	46.0
90	IFNAR1	46.0
90	IL4R	46.0
90	IKZF1	46.0
96	PRDM1	45.0
96	SQSTM1	45.0
96	MAPK11	45.0
99	MET	44.0
99	NR3C1	44.0

## Sheet: supplementary data file 3
MiRNA Name	Number of Common Genes	Genes Name
100 gene mir21	5	IL6R
		STAT3
		CCL20
		CCR7
		HDAC2
100 gene mir24	27	ARRB2
		IRAK1
		FOXP3
		SLAMF1
		IFNAR1
		CCL4
		ESR1
		PRDM1
		SMAD2
		TRAF6
		CD28
		CCL5
		IL1B
		IRF1
		SQSTM1
		IKZF1
		NR3C1
		STAT3
		CXCR5
		MYD88
		LYN
		IFNG
		CXCL9
		HDAC2
		ETS1
		VAV1
		RPS6KB1
100 gene mir27	25	CD44
		MET
		SLAMF1
		FN1
		IFNAR1
		STAT1
		SMAD2
		GATA3
		IL10
		TNFSF11
		CD28
		MX1
		IKZF1
		CSF1
		PPARG
		NR3C1
		CASP3
		IRF4
		MYD88
		LYN
		FGF2
		HDAC2
		ETS1
		GATA3
		RPS6KB1
100 gene mir122	18	FOXP3
		ESR1
		SMAD2
		CXCR3
		CD28
		RUNX2
		IL1RN
		IL1B
		NOD2
		IL21
		SMAD3
		CSF1
		NR3C1
		STAT3
		CXCL9
		HDAC2
		GNB5
		REL
100 gene mir124	24	IL6R
		TRAF6
		CD28
		ITGAX
		MAPK11
		IRF1
		STAT3
		ARRB1
		PECAM1
		CCR1
		BCL6
		TGFB1
		SMAD2
		GATA3
		TNFSF11
		NOD2
		SQSTM1
		IKZF1
		NR3C1
		TFRC
		MYD88
		ETS1
		REL
		RPS6KB1
100 gene mir125	24	IRAK1
		RUNX3
		FOXP3
		IL6R
		TNF
		ESR1
		IL13
		PRDM1
		SMAD2
		TRAF6
		CD28
		SQSTM1
		PLCG1
		IKZF1
		NR3C1
		CCR2
		STAT3
		ARRB1
		CXCR5
		IRF4
		MYD88
		IFNG
		ETS1
		CCR5
100 gene mir138	24	IRAK1
		RUNX3
		FOXP3
		IL23R
		IFNAR1
		TRAF6
		RUNX2
		SMAD3
		PLCG1
		CXCR5
		IRF4
		FGF2
		CFTR
		ESR1
		STAT1
		PRDM1
		PTPRC
		SMAD2
		IL1B
		NR3C1
		MYD88
		HDAC2
		ETS1
		CCR5
100 gene mir140	10	CD44
		PRDM1
		SMAD2
		CD28
		NR3C1
		TFRC
		CASP3
		CXCR5
		FGF2
		GNB5
100 gene mir145	19	CD44
		RUNX3
		IFNAR1
		TRAF6
		CD28
		STAT5B
		STAT3
		ARRB1
		IRF4
		PECAM1
		ESR1
		STAT1
		SMAD2
		IL1B
		IKZF1
		NR3C1
		TFRC
		MYD88
		REL
100 gene mir146	6	IRAK1
		RUNX3
		SMAD2
		TRAF6
		CCL5
		REL
100 gene mir-148	16	MET
		RUNX3
		IKZF1
		CSF1
		IL6R
		TBX21
		ESR1
		TFRC
		SOCS3
		SMAD2
		CD28
		FGF2
		ETS1
		RUNX2
		REL
		RPS6KB1
100 gene mir-155	17	ARRB2
		MET
		IKZF1
		IL6R
		NR3C1
		TBX21
		CASP3
		SMAD2
		GATA3
		CD28
		FGF2
		ETS1
		HIF1A
		SOCS1
		IL1B
		CEBPB
		RPS6KB1
100 gene mir-214	51	IRAK1
		MET
		RUNX3
		IL6R
		CASP1
		IFNAR1
		SOCS3
		TRAF6
		CD28
		STAT5B
		ITGAX
		MAPK11
		GNB1
		SMAD3
		PLCG1
		CD27
		STAT3
		ARRB1
		STAT6
		CXCR5
		IRF4
		CCR1
		IFNG
		HIF1A
		SLAMF1
		FN1
		CCL4
		ESR1
		TGFB1
		IL13
		STAT1
		CCR7
		PTPRC
		SMAD2
		IL1RN
		IL4R
		CCL5
		NOD2
		SQSTM1
		IKZF1
		CSF1
		PPARG
		NR3C1
		CCR2
		TFRC
		MYD88
		CXCL9
		HDAC2
		ETS1
		REL
		RPS6KB1
100 gene mir-219	6	SMAD2
		HDAC2
		REL
		GNB1
		ESR1
		PRDM1
100 gene mir-340	15	MET
		SLAMF1
		HRAS
		SOCS3
		SMAD2
		ITGAX
		MAPK11
		SMAD3
		PLCG1
		CSF1
		PPARG
		ICAM1
		HDAC2
		GNB5
		RPS6KB1
100 gene mir-371	17	RUNX3
		SLAMF1
		FN1
		IL23R
		PTPRC
		SMAD2
		IL10
		IRF1
		SQSTM1
		IKZF1
		CSF1
		ARRB1
		CXCR5
		HIF1A
		CFTR
		GNB5
		HLA-DRB1
100 gene mir-544	34	CD44
		IRAK1
		RUNX3
		IFNAR1
		SOCS3
		TRAF6
		CD28
		IRF1
		SMAD3
		PLCG1
		STAT3
		ARRB1
		LYN
		FGF2
		HIF1A
		HLA-DRB1
		AKT1
		SLAMF1
		ESR1
		BCL6
		STAT1
		PTPRC
		SMAD2
		GATA3
		SOCS1
		IL1B
		TLR2
		CSF1
		NR3C1
		MTOR
		TFRC
		HDAC2
		CCR5
		RPS6KB1
100 gene mir-210	23	IRAK1
		RUNX3
		FOXP3
		SLAMF1
		PTPRC
		MX1
		TLR2
		IKZF1
		NR3C1
		STAT3
		ARRB1
		STAT6
		TFRC
		CASP3
		CCRL2
		PECAM1
		HDAC2
		ETS1
		GNB5
		REL
		AKT1
		CCR5
		RPS6KB1
